# Supplementary material
Source: publisher figshare collection journal article supplement (https://karger.figshare.com/ndownloader/files/26603099)
Supplement: Supplementary file 1 [file 26603099]

| **SNP** | **Genome assembly** | **Chromosome** | **Gene** | **Position** | **ATF3 binding region** | **ATF3 binding motif** |
| --- | --- | --- | --- | --- | --- | --- |
| rs11265425 | GRCh37.p13 | 1 | *HAX1* | 154245142 | 154244794~154245278 | TGACGTCA |
| rs10400291 | GRCh37.p13 | 11 | *ME3* | 86304054 | 86303910~86304394 | TGACGTCA |

Supplementary table 2. Information on the locations and conserved sequences for ATF3 binding sites of those two SNP-containing regions.
